# Supplementary material for: The Effect of Dietary Supplementation of Crocetin for Myopia Control in Children: A Randomized Clinical Trial
Source: PubMed Central journal article supplement (PMC6724222; doi:10.3390/jcm8081179), 2019-08-07
Supplement: jcm-08-01179-s001.pdf [file jcm-08-01179-s001.pdf]

Supplementary Information for

**The Effect of Dietary Supplementation of Crocetin for Myopia Control in Children: A Randomized Clinical Trial**

Kiwako Mori<sup>1,2,4</sup>, Hidemasa Torii<sup>1,2,4</sup>, Satoko Fujimoto<sup>3,4</sup>, Xiaoyan Jiang<sup>1,2</sup>, Shin-ichi Ikeda<sup>1,2</sup>, Erisa Yotsukura<sup>1,2</sup>, Shizuka Koh<sup>3</sup>, Toshihide Kurihara<sup>1,2,\*</sup>, Kohji Nishida<sup>3,\*</sup>, Kazuo Tsubota<sup>1,\*</sup>

Supplementary Table 1

| <b>Table S1</b>   | <b>Safety</b>                                                            |   |                                    |   |                           |   |
|-------------------|--------------------------------------------------------------------------|---|------------------------------------|---|---------------------------|---|
| Subject           | 69 patients (male:38 patients, female:31 patients)                       |   |                                    |   |                           |   |
| Adverse reactions | 0 patient 0 case                                                         |   |                                    |   |                           |   |
| Adverse events    | 30 patients 50 cases (All: Not Related)                                  |   |                                    |   |                           |   |
|                   | Influenza A infection                                                    | 2 | Cold                               | 9 | Fracture<br>(Left ankle)  | 1 |
|                   | Influenza B infection                                                    | 8 | Itchy eyes                         | 1 | Parotitis                 | 1 |
|                   | EB virus infection                                                       | 1 | Bronchitis                         | 1 | Headache                  | 1 |
|                   | Allergic conjunctivitis                                                  | 2 | Seasonal allergic rhinitis         | 1 | Fever                     | 2 |
|                   | Virus conjunctivitis<br>(left eye)                                       | 1 | Acute conjunctivitis               | 1 | Sprain<br>(right big toe) | 1 |
|                   | Osteochondrosis of tarsus                                                | 1 | Acute conjunctivitis<br>(left eye) | 1 | Streptococcal infection   | 2 |
|                   | Osteochondrosis of tarsus (left heel)                                    | 1 | Acute upper respiratory infection  | 1 | Nausea                    | 1 |
|                   | Gastroenteritis                                                          | 1 | Acute sinusitis                    | 1 | Cervical lymphadenopathy  | 1 |
|                   | Sore throat                                                              | 2 | Acute chalazion<br>(left eye)      | 1 | hordeolum<br>(right eye)  | 1 |
|                   | Infectious gastroenteritis                                               | 1 | Stomatitis                         | 2 |                           |   |
| Withdrawn         | 2 patients.<br>Less intake ( <i>n</i> = 1), inconvenient ( <i>n</i> = 1) |   |                                    |   |                           |   |
